# Supplementary material for: Impact on Postoperative Pain and Recovery of a Regional Analgesia Strategy Based on the Surgical Approach for Lung Resection: A Prospective Observational Study
Source: MDPI journal article supplement (doi:10.3390/jcm11051376), 2022-03-02
Supplement: s1 [file s1]

## **Supplementary Materials**

# **Impact on Postoperative Pain and Recovery of a Regional Analgesia Strategy Based on the Surgical Approach for Lung Resection: A Prospective Observational Study**

**Marion Trouillard <sup>1</sup>, William Dupuis <sup>1</sup>, Hélène Siaudeau <sup>1</sup>, Florian Denou <sup>1</sup>, Emmanuelle Longeau <sup>1</sup>, Maxime Léger <sup>1</sup>, Myriam Ammi <sup>2</sup>, Cyril Sargentini <sup>1</sup>, Sigismond Lasocki <sup>1</sup> and Emmanuel Rineau <sup>1,\*</sup>**

<sup>1</sup> Department of Anesthesiology and Intensive Care, University Hospital of Angers, 49100 Angers, France; marion.trd@gmail.com (M.T.); williamj.dupuis@hotmail.fr (W.D.); helene.siaudeau@chu-angers.fr (H.S.); florian.denou@hotmail.fr (F.D.); emmanuelle.longeau@chu-angers.fr (E.L.); maxime.leger@chu-angers.fr (M.L.); cysargentini@chu-angers.fr (C.S.); silasocki@chu-angers.fr (S.L.)

<sup>2</sup> Department of Cardiovascular and Thoracic Surgery, University Hospital of Angers, 49100 Angers, France; myriam.ammi@chu-angers.fr

\* Correspondence: emmanuel.rineau@chu-angers.fr; Tel.: +33-2-41-35-39-51

**Figure S1.** Flow chart of the study.

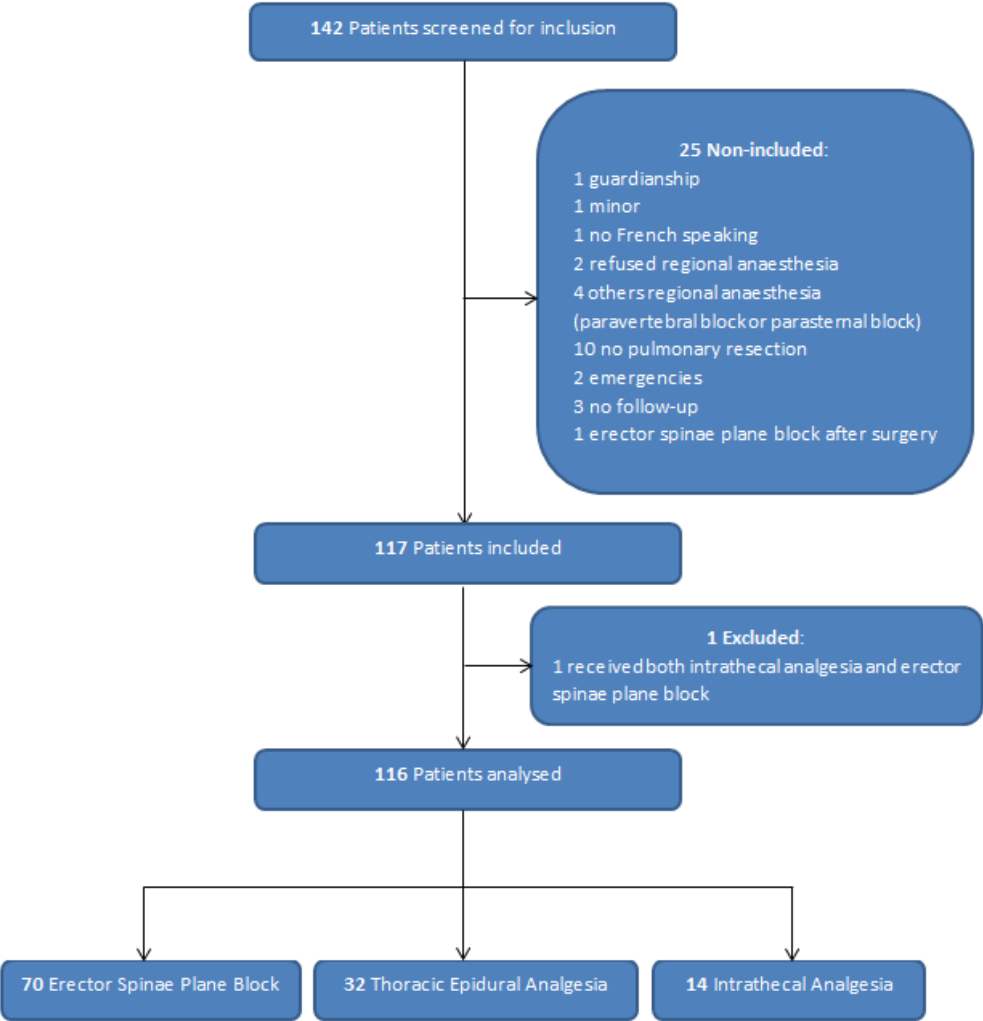

**Table S1.** Postoperative complications.

|                                | <b>ESP<br/>Group<br/>(n = 70)</b> | <b>TEA<br/>Group<br/>(n = 32)</b> | <b>IA<br/>Group<br/>(n = 14)</b> | <b>ESP vs.<br/>TEA<br/><i>p</i> Value</b> | <b>ESP vs.<br/>IA<br/><i>p</i> Value</b> | <b>TEA vs.<br/>IA<br/><i>p</i> Value</b> |
|--------------------------------|-----------------------------------|-----------------------------------|----------------------------------|-------------------------------------------|------------------------------------------|------------------------------------------|
| Lung infections                | 3 (4%)                            | 7 (22%)                           | 2 (14%)                          | 0.01                                      | 0.19                                     | 0.7                                      |
| Fibrosopic aspiration          | 4 (6%)                            | 6 (19%)                           | 2 (14%)                          | 0.07                                      | 0.26                                     | 1                                        |
| NIV                            | 4 (6%)                            | 5 (16%)                           | 2 (14%)                          | 0.13                                      | 0.26                                     | 1                                        |
| High flow oxygen therapy       | 2 (3%)                            | 3 (9%)                            | 0                                | 0.17                                      | 1                                        | 0.54                                     |
| Re-intubation                  | 1 (1.4%)                          | 2 (6%)                            | 1 (7%)                           | 0.23                                      | 0.3                                      | 1                                        |
| Thoracic drainage              | 2 (3%)                            | 0                                 | 0                                | 1                                         | 1                                        |                                          |
| Epidural haematoma             | 0                                 | 0                                 | 0                                |                                           |                                          |                                          |
| Motor dysfunction              | 0                                 | 0                                 | 0                                |                                           |                                          |                                          |
| Transient radicular irritation | 0                                 | 0                                 | 0                                |                                           |                                          |                                          |
| Confusion                      | 1 (1.4%)                          | 5 (16%)                           | 0                                | 0.01                                      |                                          | 0.3                                      |
| Over sedation                  | 0                                 | 0                                 | 1 (7%)                           |                                           | 0.16                                     | 0.3                                      |
| Hypotension                    | 6 (9%)                            | 11 (34%)                          | 2 (14%)                          | <0.01                                     | 0.61                                     | 0.28                                     |
| Supraventricular tachycardia   | 2 (3%)                            | 7 (22%)                           | 1 (7%)                           | <0.01                                     | 0.42                                     | 0.4                                      |
| Cardiorespiratory arrest       | 0                                 | 1 (3%)                            | 0                                | 0.31                                      |                                          | 1                                        |
| Acute heart failure            | 1 (1.4%)                          | 0 (0)                             | 0 (0)                            | 1                                         | 1                                        |                                          |
| PONV                           | 14 (20%)                          | 10 (31%)                          | 1 (7%)                           | 0.2                                       | 0.44                                     | 0.13                                     |
| Postoperative ileus            | 12 (17%)                          | 13 (40%)                          | 3 (21%)                          | 0.01                                      | 0.7                                      | 0.31                                     |
| Acute urinary retention        | 7 (10%)                           | 3 (9%)                            | 1 (7%)                           | 1                                         | 1                                        | 1                                        |
| ICU re-admission               | 0                                 | 0                                 | 1 (7%)                           |                                           | 0.16                                     | 0.3                                      |
| Revision surgery               | 1 (1.4%)                          | 1 (3%)                            | 1 (7%)                           | 0.53                                      | 0.3                                      | 0.52                                     |
| Death                          | 0                                 | 1 (3%)                            | 0                                | 0.31                                      |                                          | 1                                        |
| Neuropathic pain               | 14 (28%)                          | 9 (41%)                           | 5 (45%)                          | 0.29                                      | 0.29                                     | 1                                        |

Values are expressed as numbers (%)

NIV, Non-invasive ventilation; PONV, Postoperative nausea and vomiting; ICU, Intensive care unit

**Table S2.** Post hoc analysis in patients who underwent a thoracotomy

|                                           | TEA Group      | IA Group    | <i>p</i> Value |
|-------------------------------------------|----------------|-------------|----------------|
| Sample size, n                            | 27             | 9           |                |
| Length of ICU hospitalisation stay (days) | 4 [3–6]        | 2 [1–4]     | 0.01           |
| Length hospitalisation stay (days)        | 10 [7–15]      | 11 [6–12]   | 0.65           |
| Total IV morphine equivalent (mg)         | 44 [12.5–97.5] | 73 [52–89]  | 0.51           |
| Pain on admission                         | 3 [0–7.25]     | 0 [0–2.75]  | 0.22           |
| Pain at H2                                | 3 [1–6.5]      | 0.5 [0–5]   | 0.16           |
| Pain at Day 0                             | 2 [0–4]        | 2 [0.5–2.5] | 0.73           |
| Pain at rest in morning                   |                |             |                |
| Day 1                                     | 2 [0–4]        | 2 [0–3.5]   | 0.52           |
| Day 2                                     | 2 [0–3]        | 2 [0–4]     | 0.63           |
| Day 3                                     | 0 [0–2]        | 3 [0–3.5]   | 0.28           |
| Pain at rest in evening                   |                |             |                |
| Day 1                                     | 2 [0–4]        | 2 [0–4]     | 0.79           |
| Day 2                                     | 2 [0–3]        | 1 [0–2]     | 0.37           |
| Day 3                                     | 2 [0–3]        | 0 [0–0]     | 0.03           |
| Pain at chest physiotherapy               |                |             |                |
| Day 1                                     | 3 [2–7]        | 6 [3.5–7]   | 0.1            |
| Day 2                                     | 4 [1–5]        | 7 [2–7]     | 0.21           |
| Day 3                                     | 3 [1–5]        | 3 [3–4]     | 0.25           |
| Lung infections                           | 6 (22%)        | 2 (22%)     | 1              |
| Fibroscopic aspiration                    | 5 (18.5%)      | 2 (22%)     | 1              |
| NIV                                       | 5 (18.5%)      | 2 (22%)     | 1              |
| High flow oxygen therapy                  | 3 (11%)        | 0           | 0.55           |
| Re-intubation                             | 2 (7%)         | 1 (11%)     | 1              |
| Confusion                                 | 5 (18.5%)      | 0           | 0.3            |
| Hypotension                               | 11 (41%)       | 2 (22%)     | 0.44           |
| Supraventricular tachycardia              | 7 (26%)        | 1 (11%)     | 0.64           |
| Cardiorespiratory arrest                  | 1 (4%)         | 0           | 1              |
| PONV                                      | 6 (22%)        | 0           | 0.3            |
| Postoperative ileus                       | 10 (37%)       | 3 (33%)     | 1              |
| Acute urinary retention                   | 3 (11%)        | 0           | 0.55           |
| ICU re-admission                          | 0              | 1 (11%)     | 0.25           |
| Revision surgery                          | 1 (4%)         | 1 (11%)     | 0.44           |
| Death                                     | 1 (4%)         | 0           | 1              |
| Neuropathic pain                          | 6 (35%)        | 4 (50%)     | 0.48           |
| First time setting in the chair (days)    | 1 [1–1]        | 1 [1–1]     | 0.37           |
| First standing up (days)                  | 1 [1–2]        | 1 [1–1]     | 0.77           |
| Drain removal ≤ Day 3                     | 8 (30%)        | 6 (22%)     | 1              |
| Urinary catheter removal ≤ Day 3          | 20 (74%)       | 12 (89%)    | 0.65           |

Values are expressed as numbers (%) or median [interquartiles 25–75%]

NIV, Non-invasive ventilation; PONV, Postoperative nausea and vomiting; ICU, Intensive care unit
